# Supplementary material for: Modulation of ACD6 dependent hyperimmunity by natural alleles of an Arabidopsis thaliana NLR resistance gene
Source: PLoS Genet. 2018 Sep 20;14(9):e1007628. doi: 10.1371/journal.pgen.1007628 (PMC6168153; doi:10.1371/journal.pgen.1007628)
Supplement: S6 Table — (XLSX) [file pgen.1007628.s014.xlsx]

## Sheet: Sheet1
S6 Table. Binary T-DNA constructs.
Construct	Backbone	Promoter	Coding region
pMZ32	pGREENIIS	pACD6-Pro	ACD6-Pro
pMZ52	pGREENIIS	pACD6-Rmx	ACD6-Rmx
pWZ38	pGREENIIS	pSNC1-Pro	SNC1-Pro
pWZ42	pGREENIIS	pSNC1-Pro	SNC1-Est
pWZ94	pGREENIIS	pSNC1-Pro	SNC1-Pro, NL-Est
